# Supplementary material
Source: publisher figshare collection journal article supplement (https://asha.figshare.com/articles/dataset/_/5734053)
Supplement: Supplementary file 1 [file 1]

Archive with 3 entries (3 files):
- AJSLP-16-0188wambaugh_SuppS1.pdf
- AJSLP-16-0188wambaugh_SuppS2.pdf
- AJSLP-16-0188wambaugh_SuppS3.pdf
