# Supplementary material
Source: publisher figshare collection journal article supplement (https://asha.figshare.com/articles/dataset/_/5734053)
Supplement: Supplementary file 1 [file 1 › AJSLP-16-0188wambaugh_SuppS1.pdf]

## Supplemental Material S1. Examples of Participants' Discourse: Pre-Treatment Samples (Nicholas & Brookshire, 1993)

### **Participant 1**

Sundays: okay it's um ... it's ... um it's it's um ... oh x ... x it's (*laughs*) god it's one it's it's /  
uh yes (*shakes head*) ... xxxx

Cat in a Tree: uh well it's um / it's / the um / uh gosh it's xx ... uh x ... oh gosh / x / uh / god xx  
... uh ... x ... x ... x ... x xxx um ... uh / xx it's a oh it's / um it's x ... no

### **Participant 2**

Argument: mmm ... way uh aa woah ... way / wudi go mmm ... bez / x / go go mmm oh oh oh  
mmm ... oh oh ... uh shshs (*sound effect*) goxxx ... babo babka mmm ... ah (*kissing sound effect*) wedi ... mmm ... oh oh ... mmm yeah

Where you live: uh ... wudi / goka coke ... uh gogu ... chch xxx mmmm so mmm ... shushshu  
mmm ... yeah

### **Participant 3**

Sundays: um ... pray ... church um ... uh ... (*sings--no words*) um ... hi hi hi hi hi hi yeah yeah  
yeah yeah ok um ... um / well ... cold um ... walk ... mmm cold / walk um ... ss x uh TV a um  
uh ... um ... um xxx uh no uh / football yes yeah ... um ... sleep yeah ... oh um ... pick up / um  
x um was / the shit um

Picnic: um ... boat yes ... um ... Ohio ... um (*sound effect*) um ... oh yeah um ... uh ... ouch oh  
uh ... fly fly ... cup ... cup ... cup yeah ... dog ... flag ... tune tune (*P2 radio*) yeah ... pour  
yeah yeah um ... reading yeah shoot / reading / glasses ... um ... slippit slipper yeah um ... yeah  
... one two three four five six seven ... yeah ... one two three four five six seven (*counting people in the picture*) ... dog / cat cat cat nope dog ... spring yeah cold come on come on come  
on ... boat

### **Participant 4**

Birthday Party: Good good good oh now bad bad bad eat it dog eat it reaper no ... ugh ... alright  
I don't know purise! Whoops ... mm aw man ... I don't know.

Picnic: House trees sign man the man is reading wine woman buck-et oh ... wine/ and I don't  
know ... rayhiho/ dog ... a boat ... hard ... kie hi kite ... man lihil kid woman lihil girl girl ...  
ss-/ boat/ I ... I hi kite ... Ha hit.

## **Participant 5**

Sunday: Oh s- Sunday ... get get morning get my s- uh ... there's a s- sauses ... uh ... eggs and bacon and/ eat then ... then go sometime wash/ how say ... wash the/ rug no uh vvvv (*sound effect*) ... how say vvvvvv(*sound effect*) the ... wa-/ the wash the washer vvvvvv(*sound effect*) and then sometime sit down tv eh football comin back so sometime-/ sometime-he- juice/ and/ popcorn and/ see for the tv for the football that's it.

Letter: Ok ... Standing I need uh ... ne- I ca can't for uh uh letter myself but I can a car- for ... for uh ... like uh/ book for a ... how say my ... bo- for ... bible bible an ... you know bible an s- see my uh ... my uh a letter/ for myself say bible say and then after this s- s- s- get uh ... get uh a letter for um ... mail and/ get stamp and uh ... like uh stamp and uh/ how say my house/ here and that's it. It gone.

## **Notes**

x = unintelligible

*Abnormally long pauses indicated as follows:*

... a pause  $\geq 2$  seconds

/ a pause  $< 2$  seconds but deemed noticeable and unnaturally long

## **Reference**

Nicholas, L. E., & Brookshire, R. H. (1993). A system for quantifying the informativeness and efficiency of the connected speech of adults with aphasia. *Journal of Speech and Hearing Research*, 36, 338–350.
