# Supplementary material
Source: publisher figshare collection journal article supplement (https://asha.figshare.com/articles/dataset/_/5734053)
Supplement: Supplementary file 1 [file 1 › AJSLP-16-0188wambaugh_SuppS2.pdf]

## Supplemental Material S2. Probe and treatment stimuli.

### Participant 1

#### Set 1 (Traditional)

|           | <u>Subset A</u>                                                                                                                      | <u>Subset B</u>                                                                                                                                     | <u>Subset C</u>                                                                                                                                    |
|-----------|--------------------------------------------------------------------------------------------------------------------------------------|-----------------------------------------------------------------------------------------------------------------------------------------------------|----------------------------------------------------------------------------------------------------------------------------------------------------|
| Treated   | Once yearly<br>Light yellow<br>Say yippee<br>Can yodel<br>Do yoga<br>Eat yogurt<br>Is younger<br>Out yonder<br>So yummy<br>Big yucca | High scaffold<br>Red scooter<br>To Scotland<br>Deep scuba<br>Not skillful<br>How skinny<br>Your scrappy<br>Mad skeptic<br>Was sketchy<br>The skater | Ice glacier<br>Sun glaring<br>Fat glutton<br>Some glamour<br>Her gladness<br>They glisten<br>More glitter<br>No glory<br>Gem glowing<br>Men gluing |
| Untreated | His yearning<br>The yuppie<br>Does yammer<br>Was yawning<br>Not yacky                                                                | Big skirmish<br>Loud skipper<br>Now skittish<br>Two skittles<br>Hot skillet                                                                         | Not glossy<br>Was gleeful<br>So glitzy<br>Too globby<br>Few glitches                                                                               |

#### Set 2 (Intense)

|           | <u>Subset A</u>                                                                                                                                | <u>Subset B</u>                                                                                                                                                 | <u>Subset C</u>                                                                                                                                      |
|-----------|------------------------------------------------------------------------------------------------------------------------------------------------|-----------------------------------------------------------------------------------------------------------------------------------------------------------------|------------------------------------------------------------------------------------------------------------------------------------------------------|
| Treated   | Good zinger<br>Big zombie<br>Too zany<br>How zealous<br>Ten zillion<br>Tough zoning<br>New zipper<br>Like Zorro<br>Car zooming<br>Light zephyr | Is threading<br>Low throaty<br>Are thriving<br>Will threaten<br>Head throbbing<br>All throughout<br>Good throwing<br>New thriller<br>Main thruway<br>So thrifty | So tweedy<br>Thin twiggy<br>Three twenty<br>Can twitter<br>In twilight<br>Nice twinkle<br>His twanging<br>Is twitching<br>Was twisted<br>No tweeting |
| Untreated | The zenith<br>In zion<br>Real zealot                                                                                                           | Two thrushes<br>Big threshold<br>Was thrashing                                                                                                                  | New twinset<br>Some twinges<br>Good twinkie                                                                                                          |

My zapper  
Her zircon

Can throttle  
Bad thrombus

Were twining  
Her twirling

## **Participant 2**

### Set 1 (Intense)

|           | <u>Subset A</u> | <u>Subset B</u> | <u>Subset C</u> |
|-----------|-----------------|-----------------|-----------------|
| Treated   | Hat             | Half            | Ray             |
|           | Meat            | Knife           | Ring            |
|           | Hit             | Beef            | Ripe            |
|           | Boat            | Puff            | Rob             |
|           | Put             | Loaf            | Roll            |
|           | Late            | Thief           | Rush            |
|           | Thought         | Wife            | Room            |
|           | Wet             | Chef            | Run             |
|           | Shut            | Muff            | Real            |
|           | Part            | Woof            | Rash            |
| Untreated | Night           | Life            | Rain            |
|           | Boot            | Huff            | Raw             |
|           | Pat             | Chief           | Rich            |
|           | Wait            | Leaf            | Wrap            |
|           | Lot             | Laugh           | Wreath          |

### Set 2 (Traditional)

|           | <u>Subset A</u> | <u>Subset B</u> | <u>Subset C</u> |
|-----------|-----------------|-----------------|-----------------|
| Treated   | Back            | Bus             | You             |
|           | Hook            | Horse           | Yum             |
|           | Make            | Mouse           | Your            |
|           | Neck            | Nice            | Yell            |
|           | Pork            | Boss            | Young           |
|           | Lock            | Loose           | Yard            |
|           | Thick           | Juice           | Yawn            |
|           | Check           | Worse           | Year            |
|           | Shake           | Miss            | Yale            |
|           | Week            | Niece           | Yap             |
| Untreated | Hike            | Purse           | Yam             |
|           | Meek            | Pass            | Yarn            |

Knock  
Pack  
Book

Less  
This  
Choice

Yip  
Yearn  
Yeah

### **Participant 3**

#### Set 1 (Intense)

|           | <u>Subset A</u>                                                                                                                                         | <u>Subset B</u>                                                                                                                                    | <u>Subset C</u>                                                                                                                              |
|-----------|---------------------------------------------------------------------------------------------------------------------------------------------------------|----------------------------------------------------------------------------------------------------------------------------------------------------|----------------------------------------------------------------------------------------------------------------------------------------------|
| Treated   | The sabbath<br>Is mammoth<br>High birdbath<br>Worn dishcloth<br>His footpath<br>Was uncouth<br>Look beneath<br>My zenith<br>New tollbooth<br>To Kenneth | Tall basket<br>Look askance<br>White husky<br>Big musket<br>Old diskette<br>Was pesky<br>More risky<br>His whiskers<br>Long gasket<br>Good brisket | Does compare<br>Hot temper<br>On campus<br>Look wimpy<br>Will campaign<br>Up tempo<br>Book sample<br>To dampen<br>Was lumpy<br>Should pamper |
| Untrained | High regrowth<br>Some vermouth<br>Her rebirth<br>Fine locksmith<br>Big outgrowth                                                                        | Now basking<br>Seem frisky<br>Wood casket<br>Hung askew<br>Fine whiskey                                                                            | Mad rampage<br>Buy shampoo<br>Now compose<br>Loud chomper<br>Buy compact                                                                     |

#### Set 2 (Traditional)

|         | <u>Subset A</u>                                                                                                                                       | <u>Subset B</u>                                                                                                                                  | <u>Subset C</u>                                                                                                                                        |
|---------|-------------------------------------------------------------------------------------------------------------------------------------------------------|--------------------------------------------------------------------------------------------------------------------------------------------------|--------------------------------------------------------------------------------------------------------------------------------------------------------|
| Treated | Is British<br>Too childish<br>In English<br>Nice garnish<br>Does publish<br>Some varnish<br>So foolish<br>Red polish<br>Will nourish<br>Feel sluggish | Fat cobra<br>Wet debris<br>Nice fabric<br>Good charbroil<br>Such hubris<br>Sad outbreak<br>Fun rubric<br>Warm embrace<br>See libra<br>So vibrant | The pontiff<br>My canteen<br>Loud ranting<br>That mantel<br>White lentils<br>Boy venting<br>Cheap rental<br>High lantern<br>Her vintage<br>Can tinting |

|           |              |              |              |
|-----------|--------------|--------------|--------------|
| Untreated | Not selfish  | Wheat hybrid | Real phantom |
|           | Such anguish | Go abroad    | Bad printer  |
|           | Are ticklish | Can vibrate  | Be centered  |
|           | The Irish    | Sick zebra   | Use banter   |
|           | Near finish  | Not abrupt   | Harsh mentor |

#### **Participant 4**

##### Set 1 (Intense)

|           |                 |                 |                 |
|-----------|-----------------|-----------------|-----------------|
|           | <u>Subset A</u> | <u>Subset B</u> | <u>Subset C</u> |
| Treated   | Now yearly      | New glasses     | Big olive       |
|           | Pale yellow     | Sun glaring     | Will forgive    |
|           | Say yippee      | Is gliding      | Did receive     |
|           | Eat yogurt      | Less gloomy     | Is alive        |
|           | Is younger      | Her gladness    | More active     |
|           | They unite      | They glisten    | We approve      |
|           | So yummy        | Few glitches    | They survive    |
|           | Was youthful    | No glory        | Nice cursive    |
|           | Gain yardage    | Gem glowing     | Too massive     |
|           | Do yoga         | Men gluing      | Take captive    |
| Untreated | How unique      | Not glossy      | May behave      |
|           | His yearning    | Was gleeful     | Might believe   |
|           | The yuppie      | So glitzy       | Was festive     |
|           | More useful     | Too global      | Can improve     |
|           | Can yodel       | More glitter    | New motive      |

##### Set 2 (Traditional)

|         |                 |                 |                 |
|---------|-----------------|-----------------|-----------------|
|         | <u>Subset A</u> | <u>Subset B</u> | <u>Subset C</u> |
| Treated | The zebra       | Feel twinges    | Is boyish       |
|         | Not zealous     | Thin twiggy     | Will publish    |
|         | Be zany         | Four twenty     | Nice moustache  |
|         | So zippy        | On twitter      | So foolish      |
|         | Near zero       | In twilight     | Did banish      |
|         | More zestful    | Nice twinkle    | They finish     |
|         | One zillion     | Her twirling    | Has panache     |
|         | New zipper      | Is twitching    | Can refresh     |
|         | Real zealot     | All twisted     | May perish      |
|         | Go zooming      | No tweeting     | More polish     |

|           |             |               |               |
|-----------|-------------|---------------|---------------|
| Untreated | Hot zapper  | His twanging  | Might tarnish |
|           | Nice zinger | Some tweezing | We furnish    |
|           | No zoning   | Good twinkie  | Men punish    |
|           | Good ziti   | Were twining  | Light garnish |
|           | Bad zombie  | New twinset   | New airbrush  |

## **Participant 5**

### Set 1 (Traditional)

|           |                    |                  |                  |
|-----------|--------------------|------------------|------------------|
|           | <u>Subset A</u>    | <u>Subset B</u>  | <u>Subset C</u>  |
| Treated   | How practical      | One coauthor     | Is sadistic      |
|           | Talk privately     | Less breathiness | Have suggested   |
|           | So precocious      | Good Catholic    | More substantial |
|           | Should prohibit    | Did authorize    | Are exhausted    |
|           | Such prejudice     | The unfaithful   | Be mistaken      |
|           | Their preciousness | Her youthfulness | Did substitute   |
|           | My presumption     | How methodic     | Good restaurant  |
|           | Less pretentious   | So cathartic     | How sarcastic    |
|           | Good principle     | Big cathedral    | Feel domestic    |
|           | Not probable       | May empathize    | Would systemize  |
| Untreated | The president      | Half marathon    | Was sustaining   |
|           | Be productive      | Will euthanize   | Not instantly    |
|           | Seem primitive     | Is healthier     | Were substandard |
|           | Did presently      | More authentic   | Can distinguish  |
|           | Is pragmatic       | Pure nothingness | Pure scholastic  |

### Set 2 (Intense)

|         |                  |                  |                   |
|---------|------------------|------------------|-------------------|
|         | <u>Subset A</u>  | <u>Subset B</u>  | <u>Subset C</u>   |
| Treated | It flourishes    | Long division    | My consequence    |
|         | How flattering   | Like ambrosia    | Is required       |
|         | My flakiness     | Her composure    | The delinquent    |
|         | Is flirtatious   | More inclusion   | So loquacious     |
|         | Be flexible      | Bad aversion     | Might tranquilize |
|         | Such flamboyance | Rich treasury    | Too eloquent      |
|         | Hot fluorescent  | Big measurement  | Not adequate      |
|         | Good flavoring   | High foreclosure | Is aquatic        |
|         | Big flamingo     | Good cohesion    | Made sequential   |
|         | Air flotation    | The illusion     | Good acquaintance |

|           |                 |                 |                |
|-----------|-----------------|-----------------|----------------|
| Untreated | Can fluctuate   | Sun exposure    | New equipment  |
|           | Talk fluently   | Some abrasion   | Full acquittal |
|           | Too flammable   | New conclusion  | Have equity    |
|           | Not floundering | Have aphasia    | Her inquiry    |
|           | More flashiness | Need persuasion | Get misquoted  |
