# Supplementary material
Source: publisher figshare collection journal article supplement (https://asha.figshare.com/articles/dataset/_/5734053)
Supplement: Supplementary file 1 [file 1 › AJSLP-16-0188wambaugh_SuppS3.pdf]

**Supplemental Material S3. Sound Production Treatment (SPI) treatment log (minimal pair).**

Subject ID: \_\_\_\_\_ Treatment #: \_\_\_\_\_  
 Date: \_\_\_\_\_ Start Time: \_\_\_\_\_ End Time: \_\_\_\_\_ \*50–60 min # of Trials: \_\_\_\_\_  
 Treatment Phase: (*circle*) Intense Traditional

| Target Word      | B R<br>Trial 1 | B R<br>Trial 2 | B R<br>Trial 3 | B R<br>Trial 4 | B R<br>Trial 5 | B R<br>Trial 6 | B R<br>Trial 7 |
|------------------|----------------|----------------|----------------|----------------|----------------|----------------|----------------|
| 1.               |                |                |                |                |                |                |                |
| 2.               |                |                |                |                |                |                |                |
| 3.               |                |                |                |                |                |                |                |
| 4.               |                |                |                |                |                |                |                |
| 5.               |                |                |                |                |                |                |                |
| 6.               |                |                |                |                |                |                |                |
| 7.               |                |                |                |                |                |                |                |
| 8.               |                |                |                |                |                |                |                |
| 9.               |                |                |                |                |                |                |                |
| 10.              |                |                |                |                |                |                |                |
| <b>% Correct</b> |                |                |                |                |                |                |                |
| 1.               |                |                |                |                |                |                |                |
| 2.               |                |                |                |                |                |                |                |
| 3.               |                |                |                |                |                |                |                |
| 4.               |                |                |                |                |                |                |                |
| 5.               |                |                |                |                |                |                |                |
| 6.               |                |                |                |                |                |                |                |
| 7.               |                |                |                |                |                |                |                |
| 8.               |                |                |                |                |                |                |                |
| 9.               |                |                |                |                |                |                |                |
| 10.              |                |                |                |                |                |                |                |
| <b>% Correct</b> |                |                |                |                |                |                |                |
| 1.               |                |                |                |                |                |                |                |
| 2.               |                |                |                |                |                |                |                |
| 3.               |                |                |                |                |                |                |                |
| 4.               |                |                |                |                |                |                |                |
| 5.               |                |                |                |                |                |                |                |
| 6.               |                |                |                |                |                |                |                |
| 7.               |                |                |                |                |                |                |                |
| 8.               |                |                |                |                |                |                |                |
| 9.               |                |                |                |                |                |                |                |
| 10.              |                |                |                |                |                |                |                |
| <b>% Correct</b> |                |                |                |                |                |                |                |

### **Treatment Hierarchy:**

- 1) **Say word** and request repetition
  - a) If correct, 5 repetitions\*, using integral stimulation as needed, go to the next item.
  - b) If incorrect, give feedback and say, "Now let's try saying what you said." Produce "pt's response" and request repetition.
    - If correct, give feedback and say, "Now let's go back to the other word," and go to Step 2 with the target word.
    - If incorrect, give feedback, attempt with integral stimulation up to 3 times, then go to Step 2 with the target word.
- 2) **Show printed word, underline target sound, say word**, and request repetition
  - a) If correct, 5 repetitions, go to the next item.
  - b) If incorrect, go to Step 3.
- 3) **Integral stimulation** – "Watch me, listen to me, and say it with me," up to 3 times
  - a) If correct, 5 repetitions, go to the next item.
  - b) If incorrect, go to Step 4.
- 4) Give **Articulatory Placement Cues**, attempt word again after cueing using **integral stimulation**
  - a) If correct, 5 repetitions, go to the next item.
  - b) If incorrect, go to the next item.

\*Feedback: Initially 100%. Fade as appropriate at clinician's discretion as to amount (can decrease to 50%–60%). Always verbal.
